# Supplementary material for: Prevalence of Common Infectious Diseases After COVID-19 Vaccination and Easing of Pandemic Restrictions in Israel
Source: PubMed Central journal article supplement (PMC8808334; doi:10.1001/jamanetworkopen.2021.46175), 2022-02-01
Supplement: jamanetwopen-e2146175-s001.pdf [file jamanetwopen-e2146175-s001.pdf]

## Supplemental Online Content

Amar S, Avni YS, O'Rourke N, Michael T. Prevalence of common infectious diseases after COVID-19 vaccination and easing of pandemic restrictions in Israel. *JAMA Netw Open*. 2022;5(2):e2146175. doi:10.1001/jamanetworkopen.2021.46175

**eTable 1.** Diagnoses and *International Classification of Diseases, Ninth Revision (ICD-9)* Codes by Group

**eTable 2.** Mean Daily Infectious Disease Morbidity Incidence by Age Group

**eTable 3.** Mean Weekly Infectious Disease Morbidity Incidence April to June 2021 vs Expected Rates

**eTable 4.** Mean Age-Specific and Disease-Specific Incidence Rates April to June 2021 vs Expected Rates

**eTable 5.** Respiratory Infection Mean Seasonal Growth Rate by Age Group 2018 to 2021

**eFigure.** Respiratory Virus Detection by Real-Time Polymerase Chain Reaction

**eMethods 1.**

**eMethods 2.**

This supplemental material has been provided by the authors to give readers additional information about their work.

**eTable 1.** Diagnoses and *International Classification of Diseases, Ninth Revision (ICD-9)* Codes by Group

| Disease Group                | Diagnosis                              | International Classification of Diseases -9 code (ICD-9) |
|------------------------------|----------------------------------------|----------------------------------------------------------|
| Lower Respiratory Infections | Acute respiratory infections           | 460-466                                                  |
|                              | Influenza                              | 487-488                                                  |
|                              | Pneumonia                              | 480-486                                                  |
| Upper Respiratory Infections | Acute otitis media                     | 3810                                                     |
|                              | Croup                                  | 4644                                                     |
|                              | Nasal congestion                       | 478                                                      |
|                              | Pharyngitis\ Streptococcal pharyngitis | 0340                                                     |
|                              | Sinusitis                              | 461                                                      |
|                              | Upper Respiratory Infections           | 465,460                                                  |
|                              | Tonsillitis                            | 463                                                      |
| Gastrointestinal Infections  | Gastroenteritis infectious             | 0091-0092                                                |

**eTable 2.** Mean Daily Infectious Disease Morbidity Incidence by Age Group

Differences between incidence rates of 2021 were compared to daily incidence rates of 2017-2019, and to the daily incidence rates of pandemic year 2020.

| Ages (years) | Average daily all-cause morbidity incidence rates (per 100,000) in April-June |        |        |       |        | Differences between daily incidence rates during April-June 2021 to 2017-2019 |           |            |           | Differences between daily incidence rates during April-June 2021 to 2020 |           |            |           |
|--------------|-------------------------------------------------------------------------------|--------|--------|-------|--------|-------------------------------------------------------------------------------|-----------|------------|-----------|--------------------------------------------------------------------------|-----------|------------|-----------|
|              | 2017                                                                          | 2018   | 2019   | 2020* | 2021   | Mean difference                                                               | CI95% Low | CI95% High | P-value** | Mean difference                                                          | CI95% Low | CI95% High | P-value** |
| 0-3          | 121.57                                                                        | 121.18 | 106.67 | 41.75 | 143.43 | 23.95                                                                         | 7.02      | 40.88      | <0.001    | 99.32                                                                    | 80.33     | 118.31     | <0.001    |
| 4-11         | 47.29                                                                         | 48.73  | 43.46  | 16.53 | 36.45  | -11.05                                                                        | -17.32    | -4.78      | <0.001    | 19.42                                                                    | 12.51     | 26.33      | <0.001    |
| 12-19        | 22.03                                                                         | 21.67  | 19.77  | 9.26  | 14.36  | -7.18                                                                         | -8.65     | -5.70      | <0.001    | 4.92                                                                     | 2.46      | 7.38       | <0.001    |
| 20-34        | 32.29                                                                         | 32.68  | 31.48  | 16.34 | 25.20  | -7.45                                                                         | -9.28     | -5.62      | <0.001    | 8.38                                                                     | 5.39      | 11.37      | <0.001    |
| 35-59        | 33.14                                                                         | 33.69  | 34.01  | 17.83 | 27.88  | -6.31                                                                         | -8.22     | -4.39      | <0.001    | 9.57                                                                     | 6.90      | 12.24      | <0.001    |
| 60-79        | 35.07                                                                         | 34.85  | 35.00  | 18.68 | 28.19  | -7.36                                                                         | -9.89     | -4.84      | <0.001    | 9.32                                                                     | 6.78      | 11.87      | <0.001    |
| 80+          | 30.22                                                                         | 26.57  | 27.38  | 13.68 | 16.82  | -11.54                                                                        | -13.31    | -9.76      | <0.001    | 3.04                                                                     | 1.37      | 4.71       | <0.001    |

2020\* - this year was characterized by strict limitations and non-pharmaceutical interventions.

P-value\*\* - calculated using the non-parametric paired Wilcoxon test.

**eTable 3.** Mean Weekly Infectious Disease Morbidity Incidence April to June 2021 vs Expected Rates

| Age Group  | week (From beginning of April 2021) | Observed weekly Incidence Rate* [Mean±SD] | Predicted weekly mean Incidence Rate | Lower limit of predicted weekly mean Incidence Rate | Higher limit of predicted weekly mean Incidence Rate | Incidence Rate Ratio (IRR) | P-Value** |
|------------|-------------------------------------|-------------------------------------------|--------------------------------------|-----------------------------------------------------|------------------------------------------------------|----------------------------|-----------|
| 0-3 Years  | 1                                   | 693.7 ± 558.38                            | 436.24                               | 376.30                                              | 505.95                                               | 1.59                       | 0.09      |
|            | 2                                   | 712.03 ± 523.4                            | 422.19                               | 370.46                                              | 481.30                                               | 1.69                       | 0.05      |
|            | 3                                   | 802.56 ± 525.86                           | 406.37                               | 358.57                                              | 460.67                                               | 1.97                       | 0.04      |
|            | 4                                   | 955.86 ± 663.94                           | 396.81                               | 342.26                                              | 460.21                                               | 2.41                       | 0.06      |
|            | 5                                   | 1041.39 ± 728.41                          | 385.01                               | 336.48                                              | 440.66                                               | 2.70                       | 0.06      |
|            | 6                                   | 1049.16 ± 638.8                           | 378.02                               | 324.30                                              | 440.80                                               | 2.78                       | 0.04      |
|            | 7                                   | 875.32 ± 564.88                           | 368.32                               | 324.07                                              | 418.71                                               | 2.38                       | 0.04      |
|            | 8                                   | 823.11 ± 530.19                           | 360.83                               | 319.18                                              | 408.01                                               | 2.28                       | 0.04      |
|            | 9                                   | 988.63 ± 548.49                           | 357.67                               | 316.12                                              | 404.76                                               | 2.76                       | 0.03      |
|            | 10                                  | 1096.93 ± 661.74                          | 354.70                               | 312.88                                              | 402.18                                               | 3.09                       | 0.04      |
|            | 11                                  | 1236.34 ± 691.57                          | 338.77                               | 299.88                                              | 382.76                                               | 3.65                       | 0.04      |
|            | 12                                  | 1297.43 ± 753.84                          | 336.98                               | 294.28                                              | 385.96                                               | 3.85                       | 0.04      |
|            | 13                                  | 1321.31 ± 708.44                          | 341.95                               | 302.80                                              | 386.24                                               | 3.86                       | 0.03      |
| 4-11 Years | 1                                   | 144.47 ± 142.77                           | 185.37                               | 158.26                                              | 217.18                                               | 0.78                       | 0.80      |
|            | 2                                   | 164.79 ± 167.21                           | 171.19                               | 148.82                                              | 196.97                                               | 0.96                       | 0.61      |
|            | 3                                   | 174.07 ± 175.05                           | 168.75                               | 147.56                                              | 193.03                                               | 1.03                       | 0.28      |
|            | 4                                   | 209.19 ± 202.71                           | 158.60                               | 135.31                                              | 185.95                                               | 1.32                       | 0.04      |
|            | 5                                   | 258.9 ± 277.46                            | 156.54                               | 135.44                                              | 180.96                                               | 1.65                       | 0.11      |
|            | 6                                   | 256.47 ± 265.16                           | 150.97                               | 128.03                                              | 178.07                                               | 1.70                       | 0.10      |
|            | 7                                   | 209.42 ± 221.58                           | 151.69                               | 132.18                                              | 174.12                                               | 1.38                       | 0.10      |
|            | 8                                   | 202.57 ± 214.16                           | 152.21                               | 133.39                                              | 173.73                                               | 1.33                       | 0.09      |
|            | 9                                   | 240.34 ± 249.42                           | 149.98                               | 131.31                                              | 171.33                                               | 1.60                       | 0.09      |
|            | 10                                  | 291.15 ± 297.51                           | 149.96                               | 131.01                                              | 171.68                                               | 1.94                       | 0.10      |
|            | 11                                  | 341.29 ± 334.63                           | 135.93                               | 119.19                                              | 155.05                                               | 2.51                       | 0.10      |

|             |    |                 |        |        |        |      |      |
|-------------|----|-----------------|--------|--------|--------|------|------|
|             | 12 | 383.93 ± 363.11 | 138.57 | 119.73 | 160.39 | 2.77 | 0.09 |
|             | 13 | 366.48 ± 365.64 | 136.99 | 120.16 | 156.19 | 2.68 | 0.10 |
| 12-19 Years | 1  | 66.52 ± 68.32   | 89.05  | 77.07  | 102.93 | 0.75 | 0.88 |
|             | 2  | 90.03 ± 85.18   | 81.45  | 71.65  | 92.62  | 1.11 | 0.24 |
|             | 3  | 90.57 ± 95.49   | 80.87  | 71.53  | 91.46  | 1.12 | 0.16 |
|             | 4  | 98.58 ± 98.76   | 75.64  | 65.40  | 87.51  | 1.30 | 0.12 |
|             | 5  | 106.06 ± 109.92 | 75.12  | 65.80  | 85.79  | 1.41 | 0.13 |
|             | 6  | 105.26 ± 103.15 | 72.49  | 62.33  | 84.33  | 1.45 | 0.10 |
|             | 7  | 80.42 ± 90.74   | 73.49  | 64.79  | 83.38  | 1.09 | 0.26 |
|             | 8  | 84.42 ± 84.23   | 74.37  | 65.91  | 83.93  | 1.14 | 0.07 |
|             | 9  | 106.6 ± 104.03  | 73.48  | 65.07  | 83.00  | 1.45 | 0.09 |
|             | 10 | 113.28 ± 108.6  | 73.90  | 65.32  | 83.63  | 1.53 | 0.09 |
|             | 11 | 118.89 ± 110.62 | 67.78  | 60.11  | 76.44  | 1.75 | 0.08 |
|             | 12 | 123.43 ± 125.55 | 69.68  | 60.98  | 79.63  | 1.77 | 0.11 |
|             | 13 | 109.27 ± 115.43 | 68.86  | 61.09  | 77.63  | 1.59 | 0.13 |
| 20-34 Years | 1  | 137.85 ± 112.83 | 163.03 | 145.93 | 182.20 | 0.85 | 0.90 |
|             | 2  | 155.84 ± 127.92 | 151.50 | 137.37 | 167.12 | 1.03 | 0.25 |
|             | 3  | 166.62 ± 141.08 | 150.15 | 136.70 | 164.97 | 1.11 | 0.15 |
|             | 4  | 171.59 ± 150.3  | 142.02 | 127.12 | 158.71 | 1.21 | 0.16 |
|             | 5  | 188.37 ± 161.5  | 140.69 | 127.17 | 155.69 | 1.34 | 0.13 |
|             | 6  | 179.3 ± 154.13  | 136.34 | 121.54 | 152.98 | 1.32 | 0.15 |
|             | 7  | 159.26 ± 130.66 | 137.05 | 124.50 | 150.90 | 1.16 | 0.15 |
|             | 8  | 162.51 ± 132.02 | 137.45 | 125.36 | 150.74 | 1.18 | 0.14 |
|             | 9  | 181.01 ± 139.17 | 135.51 | 123.51 | 148.70 | 1.34 | 0.08 |
|             | 10 | 175.87 ± 137.92 | 135.24 | 123.08 | 148.62 | 1.30 | 0.10 |
|             | 11 | 191.97 ± 146.22 | 128.95 | 117.67 | 141.34 | 1.49 | 0.08 |
|             | 12 | 198.48 ± 156.44 | 130.64 | 117.99 | 144.67 | 1.52 | 0.10 |
|             | 13 | 218.17 ± 168.41 | 128.91 | 117.66 | 141.25 | 1.69 | 0.09 |
| 35-59 Years | 1  | 156.83 ± 127.2  | 184.56 | 164.73 | 206.84 | 0.85 | 0.98 |
|             | 2  | 175.73 ± 144.66 | 172.15 | 155.68 | 190.42 | 1.02 | 0.39 |
|             | 3  | 179.36 ± 140.99 | 168.85 | 153.35 | 185.96 | 1.06 | 0.23 |
|             | 4  | 208.1 ± 175.6   | 159.51 | 142.36 | 178.78 | 1.30 | 0.16 |
|             | 5  | 231.39 ± 195.3  | 156.48 | 141.09 | 173.60 | 1.48 | 0.13 |

|             |    |                 |        |        |        |      |      |
|-------------|----|-----------------|--------|--------|--------|------|------|
|             | 6  | 210.52 ± 176.93 | 150.78 | 134.04 | 169.68 | 1.40 | 0.14 |
|             | 7  | 191.92 ± 168.35 | 149.92 | 135.90 | 165.43 | 1.28 | 0.19 |
|             | 8  | 181.48 ± 144.65 | 148.88 | 135.52 | 163.60 | 1.22 | 0.16 |
|             | 9  | 197.36 ± 153.49 | 145.87 | 132.71 | 160.37 | 1.35 | 0.11 |
|             | 10 | 177.55 ± 127.52 | 144.53 | 131.31 | 159.12 | 1.23 | 0.09 |
|             | 11 | 200.39 ± 125.1  | 136.22 | 124.10 | 149.54 | 1.47 | 0.04 |
|             | 12 | 211.27 ± 137.25 | 137.02 | 123.55 | 151.99 | 1.54 | 0.06 |
|             | 13 | 216.57 ± 160.74 | 134.89 | 122.94 | 148.02 | 1.61 | 0.10 |
| 60-79 Years | 1  | 173.36 ± 74.11  | 189.26 | 169.60 | 211.33 | 0.92 | 0.95 |
|             | 2  | 199.78 ± 91.75  | 179.77 | 163.14 | 198.18 | 1.11 | 0.14 |
|             | 3  | 212. ± 75.29    | 174.64 | 159.19 | 191.68 | 1.21 | 0.03 |
|             | 4  | 223.22 ± 88.97  | 166.90 | 149.61 | 186.28 | 1.34 | 0.05 |
|             | 5  | 229.5 ± 95.9    | 162.39 | 147.05 | 179.42 | 1.41 | 0.05 |
|             | 6  | 212.99 ± 83.87  | 156.87 | 140.16 | 175.67 | 1.36 | 0.05 |
|             | 7  | 178.65 ± 62.34  | 153.95 | 140.18 | 169.14 | 1.16 | 0.08 |
|             | 8  | 160.81 ± 61.23  | 151.21 | 138.27 | 165.43 | 1.06 | 0.32 |
|             | 9  | 185.58 ± 44.64  | 147.82 | 135.13 | 161.77 | 1.26 | 0.00 |
|             | 10 | 192.51 ± 49.69  | 145.50 | 132.86 | 159.41 | 1.32 | 0.01 |
|             | 11 | 197.14 ± 50.27  | 136.55 | 125.08 | 149.13 | 1.44 | 0.03 |
|             | 12 | 197.8 ± 68.44   | 135.89 | 123.29 | 149.83 | 1.46 | 0.06 |
|             | 13 | 216.29 ± 50.13  | 134.04 | 122.86 | 146.29 | 1.61 | 0.02 |
| 80+ Years   | 1  | 113.95 ± 70.22  | 119.29 | 105.64 | 134.71 | 0.96 | 0.86 |
|             | 2  | 127.82 ± 73.9   | 114.85 | 103.08 | 127.96 | 1.11 | 0.04 |
|             | 3  | 139.51 ± 95.12  | 111.62 | 100.64 | 123.80 | 1.25 | 0.16 |
|             | 4  | 127.82 ± 57.32  | 107.84 | 95.37  | 121.94 | 1.19 | 0.13 |
|             | 5  | 128.55 ± 66.33  | 105.13 | 94.00  | 117.58 | 1.22 | 0.14 |
|             | 6  | 98.61 ± 41.81   | 102.26 | 90.01  | 116.18 | 0.96 | 0.61 |
|             | 7  | 108.83 ± 47.82  | 100.45 | 90.32  | 111.72 | 1.08 | 0.36 |
|             | 8  | 109.56 ± 49.53  | 98.93  | 89.35  | 109.53 | 1.11 | 0.20 |
|             | 9  | 142.43 ± 84.53  | 97.25  | 87.77  | 107.75 | 1.46 | 0.15 |
|             | 10 | 97.88 ± 21.95   | 96.13  | 86.63  | 106.68 | 1.02 | 0.43 |
|             | 11 | 107.37 ± 29.64  | 90.07  | 81.40  | 99.67  | 1.19 | 0.17 |
|             | 12 | 118.33 ± 43.83  | 89.97  | 80.41  | 100.67 | 1.32 | 0.17 |

|  |    |               |       |       |       |      |      |
|--|----|---------------|-------|-------|-------|------|------|
|  | 13 | 118.33 ± 63.4 | 89.12 | 80.57 | 98.57 | 1.33 | 0.20 |
|--|----|---------------|-------|-------|-------|------|------|

Incidence rate\* - was calculated as number of diagnoses divided by number of patients at the same age group multiplied by 100,000.

P-value\*\* - calculated using the non-parametric paired Wilcoxon test.

**eTable 4.** Mean Age-Specific and Disease-Specific Incidence Rates April to June 2021 vs Expected Rates

| Age Group   | Infectious disease           | Observed weekly Incidence Rate* [Mean±SD] | Predicted weekly mean Incidence Rate | Lower limit of predicted weekly mean Incidence Rate | Higher limit of predicted weekly mean Incidence Rate | Incidence Rate Ratio (IRR) | P-Value** |
|-------------|------------------------------|-------------------------------------------|--------------------------------------|-----------------------------------------------------|------------------------------------------------------|----------------------------|-----------|
| 0-3 Years   | Upper Respiratory Infections | 1660.58 ± 289.9                           | 687.82                               | 606.68                                              | 779.89                                               | 2.41                       | 0.00      |
|             | Lower Respiratory Infections | 435.14 ± 144.82                           | 116.22                               | 96.96                                               | 139.34                                               | 3.74                       | 0.00      |
|             | Gastrointestinal Infections  | 879.77 ± 217.29                           | 323.00                               | 283.49                                              | 368.05                                               | 2.72                       | 0.00      |
| 4-11 Years  | Upper Respiratory Infections | 539.7 ± 162.37                            | 352.89                               | 307.00                                              | 405.70                                               | 1.53                       | 0.01      |
|             | Lower Respiratory Infections | 91.81 ± 42.35                             | 37.88                                | 31.31                                               | 45.84                                                | 2.42                       | 0.00      |
|             | Gastrointestinal Infections  | 116.89 ± 30.26                            | 72.32                                | 63.32                                               | 82.62                                                | 1.62                       | 0.00      |
| 12-19 Years | Upper Respiratory Infections | 212.21 ± 33.01                            | 162.50                               | 143.64                                              | 183.86                                               | 1.31                       | 0.00      |
|             | Lower Respiratory Infections | 23 ± 6.05                                 | 17.69                                | 14.65                                               | 21.36                                                | 1.30                       | 0.07      |
|             | Gastrointestinal Infections  | 63.26 ± 16.79                             | 45.08                                | 39.49                                               | 51.46                                                | 1.40                       | 0.00      |
| 20-34 Years | Upper Respiratory Infections | 332.47 ± 34.75                            | 255.98                               | 233.02                                              | 281.20                                               | 1.30                       | 0.00      |
|             | Lower Respiratory Infections | 54.97 ± 6.8                               | 45.17                                | 39.12                                               | 52.15                                                | 1.22                       | 0.01      |
|             | Gastrointestinal Infections  | 140.29 ± 31.91                            | 118.28                               | 107.62                                              | 130.00                                               | 1.19                       | 0.01      |
| 35-59 Years | Upper Respiratory Infections | 370.01 ± 42.77                            | 276.23                               | 251.23                                              | 303.73                                               | 1.34                       | 0.00      |
|             | Lower Respiratory Infections | 107.95 ± 14.57                            | 83.98                                | 73.27                                               | 96.26                                                | 1.29                       | 0.01      |
|             | Gastrointestinal             | 107.84 ± 26.77                            | 98.95                                | 90.26                                               | 108.48                                               | 1.09                       | 0.27      |



|             | Infections                   |                |        |        |        |      |      |
|-------------|------------------------------|----------------|--------|--------|--------|------|------|
| 60-79 Years | Upper Respiratory Infections | 254.14 ± 35.13 | 199.82 | 183.92 | 217.10 | 1.27 | 0.00 |
|             | Lower Respiratory Infections | 218.55 ± 19.86 | 165.82 | 146.15 | 188.15 | 1.32 | 0.00 |
|             | Gastrointestinal Infections  | 122.61 ± 22.4  | 103.93 | 96.02  | 112.50 | 1.18 | 0.01 |
| 80+ Years   | Upper Respiratory Infections | 100.8 ± 16.93  | 72.79  | 65.42  | 81.00  | 1.38 | 0.00 |
|             | Lower Respiratory Infections | 181.03 ± 38.03 | 151.19 | 134.68 | 169.75 | 1.20 | 0.01 |
|             | Gastrointestinal Infections  | 73.32 ± 9.87   | 81.30  | 73.41  | 90.04  | 0.90 | 0.01 |

Incidence rate\* - was calculated as number of diagnoses divided by number of patients at the same age group multiplied by 100,000.

P-value\*\* - calculated using the non-parametric paired Wilcoxon test.

**eTable 5.** Respiratory Infection Mean Seasonal Growth Rate by Age Group 2018 to 2021

| Age Group   | Season              | Mean seasonal infectious growth rate (r) |                    |                    |                    | P-Value*<br>Significance of differences between growth rates in 2021 compared to 2018-2020 | P-Value*<br>Significance of differences between growth rates in 2021 compared to 2018-2019 |
|-------------|---------------------|------------------------------------------|--------------------|--------------------|--------------------|--------------------------------------------------------------------------------------------|--------------------------------------------------------------------------------------------|
|             |                     | 2018                                     | 2019               | 2020               | 2021               |                                                                                            |                                                                                            |
| 0-3 Years   | Winter (Nov-Jan)    | 1.16 (1.05 - 1.27)                       | 1.14 (1.06 - 1.22) | 1.14 (1.05 - 1.23) | 1.12 (1.03 - 1.21) | 0.015                                                                                      | 0.014                                                                                      |
|             | Summer (April-June) | 1.12 (1.03 - 1.21)                       | 1.12 (1.03 - 1.21) | 1.11 (1.04 - 1.18) | 1.12 (1.04 - 1.2)  | 0.855                                                                                      | 0.901                                                                                      |
| 4-11 Years  | Winter (Nov-Jan)    | 1.15 (1.05 - 1.25)                       | 1.13 (1.07 - 1.19) | 1.14 (1.05 - 1.23) | 1.12 (1.03 - 1.21) | 0.075                                                                                      | 0.045                                                                                      |
|             | Summer (April-June) | 1.13 (1.03 - 1.23)                       | 1.11 (1.04 - 1.18) | 1.11 (1.04 - 1.18) | 1.14 (1.04 - 1.24) | 0.692                                                                                      | 0.435                                                                                      |
| 12-19 Years | Winter (Nov-Jan)    | 1.15 (1.05 - 1.25)                       | 1.12 (1.06 - 1.18) | 1.14 (1.06 - 1.22) | 1.11 (1.02 - 1.2)  | 0.053                                                                                      | 0.025                                                                                      |
|             | Summer (April-June) | 1.13 (1.03 - 1.23)                       | 1.1 (1.03 - 1.17)  | 1.13 (1.03 - 1.23) | 1.13 (1.04 - 1.22) | 0.656                                                                                      | 0.805                                                                                      |
| 20-34 Years | Winter (Nov-Jan)    | 1.15 (1.05 - 1.25)                       | 1.13 (1.06 - 1.2)  | 1.15 (1.06 - 1.24) | 1.11 (1.03 - 1.19) | 0.014                                                                                      | 0.003                                                                                      |
|             | Summer (April-June) | 1.12 (1.03 - 1.21)                       | 1.12 (1.03 - 1.21) | 1.12 (1.02 - 1.22) | 1.12 (1.03 - 1.21) | 0.935                                                                                      | 0.964                                                                                      |
| 35-59 Years | Winter (Nov-Jan)    | 1.16 (1.06 - 1.26)                       | 1.13 (1.06 - 1.2)  | 1.14 (1.05 - 1.23) | 1.12 (1.03 - 1.21) | 0.011                                                                                      | 0.003                                                                                      |
|             | Summer (April-June) | 1.12 (1.03 - 1.21)                       | 1.11 (1.03 - 1.19) | 1.11 (1.03 - 1.19) | 1.13 (1.04 - 1.22) | 0.967                                                                                      | 0.695                                                                                      |
| 60-79 Years | Winter (Nov-Jan)    | 1.16 (1.07 - 1.25)                       | 1.12 (1.06 - 1.18) | 1.15 (1.05 - 1.25) | 1.12 (1.03 - 1.21) | 0.098                                                                                      | 0.02                                                                                       |
|             | Summer (April-June) | 1.12 (1.03 - 1.21)                       | 1.11 (1.03 - 1.19) | 1.11 (1.04 - 1.18) | 1.13 (1.03 - 1.23) | 0.534                                                                                      | 0.384                                                                                      |
| 80+ Years   | Winter (Nov-Jan)    | 1.17 (1.07 - 1.27)                       | 1.13 (1.06 - 1.2)  | 1.15 (1.06 - 1.24) | 1.12 (1.03 - 1.21) | 0.011                                                                                      | 0.005                                                                                      |
|             | Summer (April-June) | 1.11 (1.03 - 1.19)                       | 1.1 (1.03 - 1.17)  | 1.11 (1.03 - 1.19) | 1.14 (1.03 - 1.25) | < 0.001                                                                                    | <0.001                                                                                     |

P-value\*\* - calculated using Analysis of variance test (ANOVA).

**eFigure.** Respiratory Virus Detection by Real-Time Polymerase Chain Reaction

Viruses detected by RT-PCR from nasal swabs specimens obtained from patients with respiratory tracts infections between April-June, 2018-2021. N equals total tests performed per period, with the positive percentage (pos%) below for each year ; bars reflect proportions (%) of each virus detected from the total number of positive tests performed.

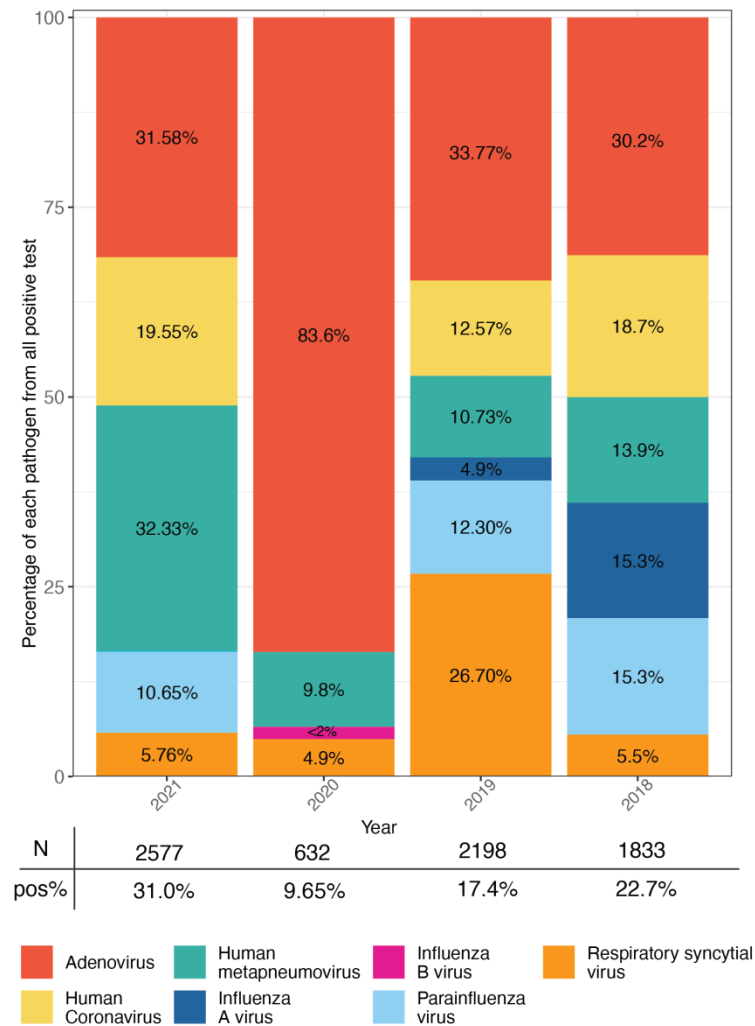

## eMethods 1.

**Formula- estimating weekly incidence rates using linear regression model, with variation in time examined as trends, season and cyclical patterns, using trigonometrical functions.**

$$\log(\text{Incidence}) = \beta_0 + \beta_1(\text{week}_i) + \beta_2\left(\sin\left(2\pi\frac{\text{week}_i}{52}\right)\right) + \beta_3\left(\cos\left(2\pi\frac{\text{week}_i}{52}\right)\right) + \beta_4(\text{season}) + \beta_5(\text{max temp}_{\text{week}_i}) + \beta_6(\text{lockdown}_2) + \beta_7(\text{week}_i - \text{week}_{\text{lockdown}_2}) + \beta_8(\text{lockdown}_3) + \beta_9(\text{week}_i - \text{week}_{\text{lockdown}_3})$$

Week<sub>i</sub> – Number of week since the beginning of the year 2021; Season – calendric seasons based on national definition (winter, spring, summer, autumn); lockdown<sub>2</sub> and lockdown<sub>3</sub> - binary variables representing existence of lockdown in week<sub>i</sub> (intervention). week<sub>i</sub>-week<sub>lockdown</sub> – the time (in weeks) passed since beginning of each lockdown (intervention).

## eMethods 2.

**Formula- calculating daily rate of exponential growth for each age-group using the daily cumulative respiratory infections incidence rate ( $C_{IR}$ ).**

$$C_{IR}(t_i)_{j,p,y} = C_{IR}(0)_{j,p,y} e^{r_{j,p,y} t_i}$$

cumulative IR ( $C_{IR}$ ) of each group (j) in year (y) and period (p) at time  $t_i$ , equals to the number of cases at the start of epidemic ( $C_{IR}(0)$ ), multiplied by exponent of the growth rate (r) constant and time;  $t_i$ : a day in calendric year; (j): age group: 0-3, 4-11, 12-19,20-34,35-59,60-79,80+; (p): seasonal period: November-January or April-June; (y) year between 2018-2021; (r): growth rate constant.
